## **Perceived changes in competence, relatedness, and autonomy reported by mothers since joining a mom-centered digital community**

Katherine E. McManus-Shipp, MA MA<sup>1,2</sup>, Christiana M. Field, MS<sup>1,2</sup>, Sandesh Bhusal, BPH<sup>1</sup>,  
Cindy-Lee Dennis, PhD<sup>3,4,5</sup>, Molly E. Waring, PhD<sup>1</sup>

<sup>1</sup> Department of Allied Health Sciences, University of Connecticut, Storrs, CT, USA

<sup>2</sup> Department of Psychological Sciences, University of Connecticut, Storrs, CT, USA

<sup>3</sup> Lawrence S. Bloomberg Faculty of Nursing, University of Toronto, Toronto, Ontario, Canada

<sup>4</sup> Lunenfeld-Tannenbaum Research Institute, Mount Sinai Hospital, Toronto, Ontario Canada

<sup>5</sup> Department of Psychiatry, University of Toronto, Toronto, Ontario, Canada

### Corresponding author:

Molly E. Waring, PhD

Department of Allied Health Sciences

University of Connecticut

358 Mansfield Rd, Unit 1101

Storrs, CT 06269

Email [molly.waring@uconn.edu](mailto:molly.waring@uconn.edu)

## Abstract

**Background:** Motherhood can profoundly challenge individuals' well-being. Social media and other digital platforms are promising modalities for reaching and supporting mothers with evidence-based psychoeducation and connection to peers. However, much is unknown about how mothers perceive these online peer communities and their impact on health and well-being.

**Purpose:** To describe mothers' perceptions of the impact of exposure to and engagement with a mom-centered digital community (Momwell) on their well-being.

**Methods:** Pregnant persons and mothers exposed to Momwell psychoeducational content and community related to motherhood via social media, podcast, or blog completed an online survey (N=569). Participants reported several perceived changes related to competence, relatedness/connection, and autonomy in decision-making since joining the Momwell community by rating their agreement with a series of questions.

**Results:** All but two participants identified as mothers; 45% were either pregnant or within 12 months postpartum. The majority agreed with statements about perceived changes in their lives, well-being, and feelings since joining the Momwell community (82-97%). All participants reported positive changes related to their sense of competence, 99% reported positive changes related to relatedness, and 97% reported positive changes related to autonomy.

**Conclusion:** Exposure to psychoeducational content related to motherhood and maternal mental health and peer engagement within a mom-centered community can enhance maternal well-being through positive changes in competence, relatedness, and autonomy.

**Keywords:** maternal mental health; digital health; social media; podcasts

## Introduction

The birth of a child dramatically changes one's life and routines, and many mothers feel pressured to live up to societal expectations of motherhood or struggle to balance life roles and responsibilities, which can negatively impact their mental health [1,2] and well-being [3,4]. Believing in their ability to parent, and experiencing a sense of belonging, and feeling empowered to make decisions can improve overall well-being. This relates to one of the most common and well-researched theories on well-being known as Self-Determination Theory (SDT) [5]. This theory states that individuals have three basic needs that influence their well-being: (1) *competence*, or confidence and belief in one's abilities, (2) *relatedness*, or the need to feel connected to and supported by others and experience a sense of belonging, and (3) *autonomy*, or the feeling that one has a choice in their decision-making, behavior, and attitudes. SDT is frequently integrated into the parenting literature, where it is often applied to infant feeding practices [6,7] and improving child socioemotional and behavioral outcomes [8]. However, fewer studies have applied this theory to maternal well-being during the early stages of parenting [9]. Given the evidence to support the role of competence, relatedness, and autonomy in fostering healthy psychosocial functioning and well-being in children, understanding the role these concepts play in facilitating the well-being of mothers as they navigate the challenges of parenting is needed.

Mothers seek information and support from peers, often on social media or other digital platforms [3,4,10,11]. As the majority of women of childbearing age in the United States [12–14] and Canada [15] use social media, and an increasing proportion listen to podcasts [16], these digital media may be a way to connect pregnant persons and mothers with psychoeducation and support from peers. However, little is known about how pregnant persons and mothers perceive the information and support they receive from online peer communities and how it impacts their lives. Specifically, it is unclear how mothers utilize information regarding mental health, how the peer community influences their perceptions and confidence as mothers, and how such information impacts their willingness to identify and prioritize their own mental health and physical needs.

To address this gap, we conducted a research study to survey perinatal persons and mothers who followed and engaged with a mom-centered digital community, Momwell [17]. Momwell offers a mom-centered model of care that seeks to educate, empower, and support mothers (momwell.com). Founded and led by a psychotherapist based in Canada, Momwell provides evidence-based psychoeducational content about motherhood, parenting, and maternal mental health through its social media feeds (Instagram, Facebook, and TikTok), weekly podcasts, and blogs with posts corresponding to the podcast episodes. Based on SDT, exposure to and engagement with Momwell content and the peer community may build competence by providing psychoeducation and resources that mothers can apply daily. Online peer communities like Momwell can enhance relatedness by creating opportunities for connection with other mothers and encouraging partner and family involvement in childcare. Further, exposure to and engagement with Momwell psychoeducational content and peer community may strengthen autonomy by supporting mothers in making evidence-informed decisions related to their physical and mental health and parenting practices.

In this report, we describe maternal perceived changes in knowledge, attitudes, and competence related to motherhood and mental health since joining the Momwell community. We also describe perceived changes related to the SDT domains of competence, relatedness, and autonomy.

## Methods

In the summer and early fall of 2023, we recruited perinatal persons and mothers who were exposed to or engaged with Momwell via social media or other digital platforms to complete an online survey. A detailed description of the study design is available elsewhere [17]. Briefly, we collaborated with the Momwell team to post recruitment messages on social media, in their email newsletter, and via a podcast advertisement. Interested individuals clicked a link to complete an eligibility screener via Qualtrics. Eligible individuals were 18 years or older, a member of the Momwell community (i.e., followed Momwell on Instagram, Facebook, or TikTok, listened to their podcast, read their blog, or received their email newsletters), comfortable participating in the study in English, and able and willing to provide informed consent. Individuals were recruited to participate in two cohorts where Cohort 1 completed a longer survey and Cohort 2 completed a shorter survey. Additional eligibility criteria for Cohort 1 were (1) perinatal (e.g., currently pregnant and/or within 12 months postpartum) and/or identified as the mother of at least one child under the age of 18 who lived with them at least part-time, and (2) living in Canada or the United States. We employed several strategies to ensure the eligibility and validity of enrolled participants (for details, see [17]). Participants in Cohort 1 who completed the longer survey received a gift card (\$15 USD or \$20 CAD). Cohort 2 participants who completed the shorter survey were entered into a lottery in which one in every 30 participants was randomly selected to receive a gift card (\$60 USD or \$80 CAD). The University of Connecticut Institutional Review Board (IRB) approved this study.

Participants reporting exposure to psychoeducation content on the Momwell platform were asked how recently they started following Momwell on each of their digital platforms (within the past 7 days, at least 7 days ago but less than 3 months ago, at least 3 months ago but less than 6 months ago, at least 6 months ago but less than 12 months ago, and at least 12 months ago). Participants who started following Momwell within the past 7 days were considered new community members and were not asked questions about changes in their lives and well-being.

Participants reported the extent to which they agreed with several statements about changes to their lives since joining the Momwell community (e.g., “I feel more aware of the signs and symptoms of mental health conditions”, “I feel more confident in my approach to parenting”). Response options were “strongly disagree”, “disagree”, “agree”, and “strongly agree”. We calculated the proportion of participants who responded “agree” or “strongly agree” for each item. We mapped these questions onto the three domains of SDT (Table 1). We calculated changes related to each domain as the highest level of agreement with questions within that domain. For the reversed item, we reversed coding and considered “disagree” to be “agree” when calculating the composite variable for competence. Internal consistency of these composite variables was good (Cronbach’s  $\alpha = 0.77, 0.75, \text{ and } 0.70$ , respectively, for the competence, relatedness, and autonomy scores).

Participants reported whether they were pregnant or postpartum (i.e., within 12 months of giving birth) and whether they identified as a mother of one or more children aged 0-17 years who lived with them at least part-time. All but two participants identified as mothers (they were pregnant) and thus in this study we refer to participants as “mothers”. Participants also reported their gender, country of residence, educational attainment, employment status, and whether they self-identified as someone who was a visible minority [18]. Participants reported how difficult it has been for them in the past 30 days to pay for usual household expenses (e.g., food, rent, car payments, medical expenses) as a measure of financial strain [19]. Participants in Cohort 1 were

further asked whether they had a parenting partner. Characteristics of the full sample are described elsewhere [17].

### Statistical analyses

The eligibility screener and surveys were administered in Qualtrics (Qualtrics LLC, Provo, UT). We used Research Electronic Data Capture (REDCap) for participant tracking [20]. Analyses were conducted in SAS 9.4 (SAS Institute, Inc., Cary, NC). After excluding  $n=15$  who joined the Momwell community in the past 7 days who were not asked the questions of interest, our analytic sample included 569 mothers. We described the characteristics of the analytic sample and then participant responses to questions about changes they have made since they joined the Momwell community. We also described the proportion of participants who perceived changes related to the three domains of SDT: competence, relatedness, and autonomy.

We conducted multiple sensitivity analyses. As one item asked about communication with their partner/co-parent, we repeated the analysis limited to (1) participants who reported that their children lived with 2 parents in the same household ( $n=542$ ), and (2) mothers in Cohort 1 who reported that they had a parenting partner ( $n=280$ ; only participants in Cohort 1 were asked whether they had a parenting partner). Twelve participants selected the same response for all 13 items ( $n=8$  all “agree”;  $n=4$  all “strongly agree”). As one item was reverse worded, such that agreeing or strongly agreeing represented a negative change since joining the Momwell community, this response pattern may represent inattention to the survey items (i.e., straight-lining). We conducted a sensitivity analysis in which we excluded these participants ( $N=557$ ). Finally, as our interest was in the perceived impact of the free psychoeducational content and peer community, we conducted a sensitivity analysis limited to participants who had never purchased for-fee services (i.e., guided journal or other self-paced tool, course or workshop, therapy with Momwell therapist;  $n=423$ ).

### **Results**

Participants in the analytic sample ( $N=569$ ) were on average 34.2 (SD: 3.9) years old, 45% were perinatal (10% pregnant, 36% post-partum), 13% self-identified as a visible minority, 87% had a 4-year college/university degree or higher education, 49% were working full-time, and 43% reported some difficulty in paying for basic expenses. Most (76%) participants had joined the Momwell community more than 12 months ago, 16% had joined at least 6 months but less than 12 months ago, and 8% had joined in the past 6 months.

Most participants agreed or strongly agreed with statements about perceived changes in their lives, well-being, and feelings since joining the Momwell community (Table 1). Overall, 82% reported that they are now more likely to prioritize their own health and 96% indicated they felt more aware of the signs and symptoms of mental health problems (Table 1). In terms of changes related to the SDT domains, 100% reported an improved sense of competence, 99% reported increased feelings of relatedness to other mothers, and 97% indicated enhanced autonomy (Figure 1). Results from sensitivity analyses were very similar to the main results (Supplemental Table 1).

### **Discussion**

We found the majority of mothers reported increased competence, relatedness, and autonomy since joining the Momwell community. Participants expressed that they had made several positive changes related to their physical and mental health, self-efficacy as mothers, and

relationships with partners/co-parents and children since joining the Momwell community. Importantly, 96% reported feeling more aware of the signs and symptoms of mental health problems. Such results are promising given that poor mental health literacy is a well-established barrier to help-seeking [2] and effective mental health literacy interventions are said to improve both knowledge and help-seeking [21]. Additionally, 88% reported being more likely to seek mental health care when they needed it. Given that many women experience elevated postpartum mood symptoms yet do not seek care [22], our results are particularly encouraging and suggest that utilizing mom-centered digital communities may be an important promotor of help-seeking behavior. Further, participants reported they felt more confident and optimistic in their parenting approach since joining the Momwell community, suggesting that exposure to and engagement with digital platforms may increase maternal competence and confidence. These results align with a recent systematic review that found that participation in digital parenting interventions increased parenting self-efficacy [23].

Participants reported an increased sense of relatedness where they felt they were part of a community and were more willing to communicate with their partners about their needs. This finding suggests that following a mom-centered account on social media or other digital platforms can foster a sense of community and belonging and may increase maternal perceived support. Previous studies have demonstrated the benefits of peer support on perinatal and maternal mental health [24,25], and the current findings hold important implications for partner support and potentially improving maternal relationship satisfaction and co-parenting outcomes. This is critical given perceived partner support is repeatedly associated with positive maternal and infant outcomes postpartum [26] and maternal mental health outcomes [27].

Most participants reported increased autonomy, particularly feeling ready to act on their feelings, treat themselves with self-compassion, and prioritize their health. While mothers of young children often do not prioritize their own health, more than 80% of mothers in our study reported that they were more likely to prioritize their health since joining the Momwell community. Given the importance of diet, physical activity, and sleep to long-term cardiometabolic health [28], our finding that mothers feel more empowered to engage in health behaviors after engaging with a digital mom-centered community is clinically relevant. Consistent with our results, a recent study of mothers with children under 3 years found that the two most commonly reported external facilitators to engaging in self-care were partners and encouragement from others [29]. Further, we found that 92% of mothers reported being kinder to themselves during challenging times with their children since joining the Momwell community. As self-compassion has been associated with more positive views on prioritizing one's own health behaviors among mothers [30], online communities such as Momwell may also increase mothers' prioritization of their health through increased self-compassion. Future studies should investigate ways in which exposure to or engagement with social media content and peer communities impacts maternal health behaviors and perceived autonomy to make health-promoting decisions.

This study has limitations. Common to much survey research, our sample consisted of members of the target population who volunteered to participate in our study. Thus, perceived changes since joining the Momwell community may overrepresent the experiences of those for whom Momwell has positively influenced their lives. Additionally, our sample likely overrepresents Momwell followers who are more engaged on social media and thus more likely to see our recruitment messages [31,32]. We reported perceived changes in maternal thoughts, feelings, and actions since joining the Momwell community measured by a single item per



domain. While these questions have high face validity, social desirability bias in responding is possible. Future research studies could use longer, validated psychological scales measuring each domain. It is likely that participants experienced many life changes since they joined the Momwell community, and these experiences and other factors likely also influenced changes in competence, relatedness, and autonomy related to maternal well-being over this time period.

Future research could extend these results by incorporating qualitative perspectives from mothers to provide additional context to our findings, for example, asking mothers to describe what content or interaction in the community had the biggest positive impact on them. This line of inquiry would allow researchers to more precisely pinpoint influential psychoeducational content to improve mothers' sense of competence, relatedness, and autonomy. Social media content platforms and providers can then incorporate these research insights. Further, future research should explore how competence, relatedness, and autonomy change over time, as mothers join mom-centered digital communities, consume psychoeducational content, and engage with peers. It would also be worthwhile to investigate the relationships between exposure and engagement, SDT variables, and mental health outcomes as a marker of well-being and to identify for whom engagement in these platforms is most beneficial. Findings from such studies could inform the development of clinical practice guidelines that can assist healthcare providers in recommending online communities and information sources to improve health outcomes. Finally, policymakers should recognize the value of online support initiatives that expand access to digital health resources and aid healthcare providers in integrating online psychoeducation resources into their standard clinical care.

This study contributes to our understanding of the benefits mothers perceive from health information and peer support they receive through social media and other digital platforms such as podcasts and blogs. Our findings suggest that exposure to and engagement with digital mom-centered psychoeducational content and peer community focused on perinatal and maternal mental health and parenting may enhance maternal competence, relatedness, and autonomy, thus influencing overall well-being. SDT provides a useful framework for understanding the impact on mothers of exposure to and engagement with psychoeducational content and community provided through social media and other digital platforms.

### **Acknowledgements**

This study was funded by a grant from the Daymark Foundation (PI: Waring). Vani Jain of the Daymark Foundation and Erica Djossa of Momwell provided input into the design of this study, particularly by providing input into the research questions and concepts to be measured, and Erica Djossa and Momwell staff helped to develop recruitment messages (which were then approved by the University of Connecticut IRB) and disseminated these messages to their followers/subscribers. The Daymark Foundation and Momwell had no additional role in data collection or results reporting.

### **Conflicts of Interest**

None.

### **References**

1. Meeussen L, Van Laar C. Feeling Pressure to Be a Perfect Mother Relates to Parental Burnout and Career Ambitions. *Front Psychol.* 2018;9:2113.

2. Daehn D, Rudolf S, Pawils S, Renneberg B. Perinatal mental health literacy: knowledge, attitudes, and help-seeking among perinatal women and the public - a systematic review. *BMC Pregnancy Childbirth*. 2022 Jul 19;22(1):574.
3. Elliott GMC, Letvak S, Côté-Arsenault D, Wallace DC, Smith JM. First-Time Mothers' Invisible Presence Using Social Networking Sites. *MCN Am J Matern Child Nurs*. 2022 Dec 1;47(6):318–26.
4. Beyers-Carlson E, Schoenebeck S, Volling BL. Mother of One to Mother of Two: A Textual Analysis of Second-Time Mothers' Posts on the BabyCenter LLC Website. *Front Psychol*. 2022;13:859085.
5. Ryan RM, Deci EL. Self-determination theory and the facilitation of intrinsic motivation, social development, and well-being. *Am Psychol*. 2000 Jan;55(1):68–78.
6. Zimmer-Gembeck MJ, Joyce J, Kerin J, Webb H, Morrissey S, McKay A. Self-determination theory and food-related parenting: The Parent Socioemotional Context of Feeding Questionnaire. *J Fam Psychol*. 2019 Jun;33(4):476–86.
7. Baker K, Figueroa R. Motivation, Attitudes, and Diet Quality Among US Parents and Adolescents. *Am J Health Behav*. 2021 Jan;45(1):125–37.
8. Grolnick WS, Levitt MR, Caruso AJ, Lerner RE. Effectiveness of a brief preventive parenting intervention based in self-determination theory. *J Child Fam Stud*. 2021 Apr;30(4):905–20.
9. Brenning K, Soenens B. A Self-Determination Theory Perspective on Postpartum Depressive Symptoms and Early Parenting Behaviors. *J Clin Psychol*. 2017;73(12):1729–43.
10. Ryan R, Davis-Kean P, Bode L, Krüger J, Mneimneh Z, Singh L. Parenting online: analyzing information provided by parenting-focused Twitter accounts. *Atl J Commun*. 2022;1–17.
11. Adamski M, Truby H, Klassen K, Cowan S, Gibson S. Using the Internet: Nutrition Information-Seeking Behaviours of Lay People Enrolled in a Massive Online Nutrition Course. *Nutrients*. 2020;12(3).
12. Duggan M, Lenhart A, Lampe C, Ellison NB. Parents and Social Media [Internet]. 2015. Available from: <https://www.pewresearch.org/internet/2015/07/16/parents-and-social-media/>
13. Waring ME, Blackman Carr LT, Heersping GE. Social Media Use Among Parents and Women of Childbearing Age in the US. *Prev Chronic Dis*. 2023 Feb 16;20:E07.
14. Gottfried J. Americans' Social Media Use [Internet]. Pew Research Center; 2024 Jan. Available from: <https://www.pewresearch.org/internet/2024/01/31/americans-social-media-use/>
15. Schimmele C, Fonberg J, Schellenberg G. Canadians' assessments of social media in their lives. *Stat Can Econ Soc Rep*. 2021;1(3).
16. Shearer E, Liedke J, Matsa KE, Lipka M, Jurkowitz M. Podcasts as a source of news and information [Internet]. 2023. Available from: <https://www.pewresearch.org/journalism/2023/04/18/podcasts-as-a-source-of-news-and-information/>
17. Waring ME, McManus-Shipp KE, Field CM, Bhusal S, Perez A, Shapiro O, et al. Exposure to and engagement with digital psychoeducational content and community related to maternal mental health by perinatal persons and mothers: design of an online survey with



- optional follow-up and participant characteristics [PRE-PRINT] [Internet]. medRxiv. 2024. Available from: <https://www.medrxiv.org/content/10.1101/2024.07.08.24310070v1>
18. Dennis CL, Marini F, Prioreshi A, Dol J, Birken C, Bell RC. The Canadian Healthy Life Trajectories Initiative (HeLTI) Trial: a study protocol for monitoring fidelity of a preconception-lifestyle behaviour intervention. *Trials*. 2023 Apr 7;24(1):262.
  19. Hall MH, Matthews KA, Kravitz HM, Gold EB, Buysse DJ, Bromberger JT, et al. Race and financial strain are independent correlates of sleep in midlife women: the SWAN sleep study. *Sleep*. 2009 Jan;32(1):73–82.
  20. Harris PA, Taylor R, Thielke R, Payne J, Gonzalez N, Conde JG. Research electronic data capture (REDCap)--a metadata-driven methodology and workflow process for providing translational research informatics support. *J Biomed Inf*. 2009 Apr;42(2):377–81.
  21. Kutcher S, Wei Y, Coniglio C. Mental Health Literacy: Past, Present, and Future. *Can J Psychiatry Rev Can Psychiatr*. 2016 Mar;61(3):154–8.
  22. Prevatt BS, Desmarais SL. Facilitators and barriers to disclosure of postpartum mood disorder symptoms to a healthcare provider. *Matern Child Health J*. 2018 Jan;22(1):120–9.
  23. Lin-Lewry M, Thi Thuy Nguyen C, Hasanul Huda M, Tsai SY, Chipojola R, Kuo SY. Effects of digital parenting interventions on self-efficacy, social support, and depressive symptoms in the transition to parenthood: A systematic review and meta-analysis. *Int J Med Inf*. 2024 May;185:105405.
  24. Dennis CL, Hodnett E, Kenton L, Weston J, Zupancic J, Stewart DE, et al. Effect of peer support on prevention of postnatal depression among high risk women: multisite randomised controlled trial. *BMJ*. 2009 Jan 15;338:a3064.
  25. Fang Q, Lin L, Chen Q, Yuan Y, Wang S, Zhang Y, et al. Effect of peer support intervention on perinatal depression: A meta-analysis. *Gen Hosp Psychiatry*. 2022 Feb;74:78–87.
  26. Tanner Stapleton LR, Schetter CD, Westling E, Rini C, Glynn LM, Hobel CJ, et al. Perceived Partner Support in Pregnancy Predicts Lower Maternal and Infant Distress. *J Fam Psychol JFP J Div Fam Psychol Am Psychol Assoc Div 43*. 2012 Jun;26(3):453–63.
  27. J Henshaw E, Cooper M, Wood T, N Doan S, Krishna S, Lockhart M. Psychosocial predictors of early postpartum depressive and anxious symptoms in primiparous women and their partners. *BMC Pregnancy Childbirth*. 2023 Mar 27;23(1):209.
  28. Sun J, Li Y, Zhao M, Yu X, Zhang C, Magnussen CG, et al. Association of the American Heart Association’s new “Life’s Essential 8” with all-cause and cardiovascular disease-specific mortality: prospective cohort study. *BMC Med*. 2023 Mar 29;21(1):116.
  29. Lax ES, Graziosi M, Gioia AN, Arunagiri V, Novak SA. “More Than Just a Manicure” Qualitative Experiences of Maternal Self-Care During COVID-19. *Womens Health Rep New Rochelle N*. 2023;4(1):571–83.
  30. Simpson KM, Semenchuk BN, Strachan SM. Put MY mask on first: Mothers’ reactions to prioritizing health behaviours as a function of self-compassion and fear of self-compassion. *J Health Psychol*. 2022 Apr 1;27(5):1259–66.
  31. Mosseri A. Instagram Ranking Explained | Instagram Blog [Internet]. 2023 [cited 2024 Mar 28]. Available from: <https://about.instagram.com/blog/announcements/instagram-ranking-explained>
  32. Meta. Our Approach to Facebook Feed Ranking [Internet]. 2023 [cited 2024 Mar 28]. Available from: <https://transparency.fb.com/features/ranking-and-content/>

## Tables and Figures

Table 1: Perceived changes in knowledge, beliefs, and competence related to motherhood and maternal mental health since joining the Momwell community (N=569\*)

| Since joining the Momwell community...                                                                                   | Strongly disagree, N (%) | Disagree, N (%) | Agree, N (%)    | Strongly agree, N (%) | Agree or strongly agree, N (%) |
|--------------------------------------------------------------------------------------------------------------------------|--------------------------|-----------------|-----------------|-----------------------|--------------------------------|
| I feel more aware of the signs and symptoms of mental health conditions.                                                 | --                       | 21 (4)          | 267 (47)        | 280 (49)              | 547 (96)                       |
| I am more likely to seek mental health care when I need it.                                                              | 1 (<1)                   | 68 (12)         | 286 (50)        | 213 (38)              | 499 (88)                       |
| I feel more confident in my approach to parenting.                                                                       | --                       | 55 (10)         | 352 (62)        | 157 (28)              | 509 (90)                       |
| I feel more optimistic about my future as a parent.                                                                      | 1 (<1)                   | 53 (9)          | 346 (61)        | 166 (29)              | 512 (90)                       |
| I have felt worse about myself as a parent/mother.                                                                       | 266 (47)                 | 255 (45)        | 30 (5)          | 13 (2)                | 43 (8)                         |
| <b>Perceived changes in competence</b>                                                                                   | --                       | --              | <b>160 (28)</b> | <b>409 (72)</b>       | <b>569 (100)</b>               |
| I feel like I am more open to hearing and understanding mental health challenges and experiences other mothers may face. | --                       | 19 (3)          | 298 (53)        | 249 (44)              | 547 (97)                       |
| I feel more comfortable talking to friends and family about how I'm feeling.                                             | 3 (<1)                   | 56 (10)         | 295 (52)        | 212 (37)              | 507 (90)                       |
| I have been inspired to talk with my partner/co-parent about how we share parenting responsibilities.                    | 2 (<1)                   | 79 (14)         | 275 (49)        | 209 (37)              | 484 (86)                       |
| I feel like I am part of a supportive community.                                                                         | 2 (<1)                   | 89 (16)         | 347 (61)        | 128 (23)              | 475 (84)                       |
| I feel less alone.                                                                                                       | --                       | 42 (7)          | 321 (57)        | 204 (36)              | 525 (93)                       |
| <b>Perceived changes in relatedness</b>                                                                                  | --                       | <b>4 (1)</b>    | <b>172 (30)</b> | <b>393 (69)</b>       | <b>565 (99)</b>                |
| I feel more ready to act on my feelings.                                                                                 | 1 (<1)                   | 103 (18)        | 352 (62)        | 110 (19)              | 462 (82)                       |
| I am kinder to myself when things with my children don't go "right".                                                     | --                       | 47 (8)          | 336 (59)        | 184 (32)              | 520 (92)                       |
| I am more likely to prioritize my own health, for example, my own diet, exercise, and sleep.                             | 3 (<1)                   | 100 (18)        | 309 (55)        | 155 (27)              | 464 (82)                       |
| <b>Perceived changes in autonomy</b>                                                                                     | --                       | <b>17 (3)</b>   | <b>291 (51)</b> | <b>261 (46)</b>       | <b>552 (97)</b>                |

\* Missing data n<4 for all items. Analyses of items about parenting excluded n=2 who were pregnant but did not identify as a mother.

## Perceived changes in competence, relatedness, and autonomy reported by mothers since joining a digital mom-centered community

### Online Supplemental Appendix

Supplemental Table 1: Perceived changes in knowledge, beliefs, and competence related to motherhood and maternal mental health since joining the Momwell community, N (%)\*

| Since joining the Momwell community...                                                                                   | Full analytic sample (N=569) | Mothers living in 2-parent household (N=542) | Cohort 1 mothers with a parenting partner (N=280) | Excluding participants who potentially straight-lined measure (N=557) | Participants who have not purchased paid resources or services from Momwell (N=423) |
|--------------------------------------------------------------------------------------------------------------------------|------------------------------|----------------------------------------------|---------------------------------------------------|-----------------------------------------------------------------------|-------------------------------------------------------------------------------------|
| I feel more aware of the signs and symptoms of mental health conditions.                                                 | 547 (96)                     | 521 (96)                                     | 271 (97)                                          | 535 (96)                                                              | 402 (95)                                                                            |
| I am more likely to seek mental health care when I need it.                                                              | 499 (88)                     | 475 (88)                                     | 253 (90)                                          | 487 (88)                                                              | 365 (86)                                                                            |
| I feel more confident in my approach to parenting.                                                                       | 509 (90)                     | 486 (90)                                     | 255 (91)                                          | 497 (90)                                                              | 372 (89)                                                                            |
| I feel more optimistic about my future as a parent.                                                                      | 512 (90)                     | 489 (90)                                     | 252 (90)                                          | 500 (90)                                                              | 379 (90)                                                                            |
| I have felt worse about myself as a parent/mother.                                                                       | 43 (8)                       | 41 (8)                                       | 23 (8)                                            | 31 (6)                                                                | 25 (6)                                                                              |
| <b>Perceived changes in competence</b>                                                                                   | <b>569 (100)</b>             | <b>542 (100)</b>                             | <b>280 (100)</b>                                  | <b>557 (100)</b>                                                      | <b>423 (100)</b>                                                                    |
| I feel like I am more open to hearing and understanding mental health challenges and experiences other mothers may face. | 547 (97)                     | 525 (97)                                     | 271 (97)                                          | 535 (97)                                                              | 407 (97)                                                                            |
| I feel more comfortable talking to friends and family about how I'm feeling.                                             | 507 (90)                     | 484 (90)                                     | 250 (89)                                          | 495 (89)                                                              | 367 (87)                                                                            |
| I have been inspired to talk with my partner/co-parent about how we                                                      | 484 (86)                     | 463 (86)                                     | 243 (87)                                          | 472 (85)                                                              | 353 (84)                                                                            |

|                                                                                              |                 |                 |                     |                 |                 |
|----------------------------------------------------------------------------------------------|-----------------|-----------------|---------------------|-----------------|-----------------|
| share parenting responsibilities.                                                            |                 |                 |                     |                 |                 |
| I feel like I am part of a supportive community.                                             | 475 (84)        | 455 (84)        | 233 (84)            | 463 (84)        | 347 (82)        |
| I feel less alone.                                                                           | 525 (93)        | 499 (92)        | 255 (91)            | 513 (92)        | 389 (92)        |
| <b>Perceived changes in relatedness</b>                                                      | <b>565 (99)</b> | <b>538 (99)</b> | <b>279 (&gt;99)</b> | <b>553 (99)</b> | <b>419 (99)</b> |
| I feel more ready to act on my feelings.                                                     | 462 (82)        | 442 (82)        | 236 (84)            | 450 (81)        | 335 (80)        |
| I am kinder to myself when things with my children don't go "right".                         | 520 (92)        | 495 (91)        | 259 (93)            | 508 (92)        | 383 (91)        |
| I am more likely to prioritize my own health, for example, my own diet, exercise, and sleep. | 464 (82)        | 440 (81)        | 232 (83)            | 452 (81)        | 338 (80)        |
| <b>Perceived changes in autonomy</b>                                                         | <b>552 (97)</b> | <b>525 (97)</b> | <b>274 (98)</b>     | <b>540 (97)</b> | <b>408 (96)</b> |

\* Proportion responding "agree" or "strongly agree". Missing data n<4 for all items. Analyses of items about parenting excluded n=2 who were pregnant but did not identify as a mother.
